# Supplementary figures and images for: Analyses of circRNA Expression throughout the Light-Dark Cycle Reveal a Strong Regulation of Cdr1as, Associated with Light Entrainment in the SCN
Source: MDPI journal article supplement (doi:10.3390/ijms232012347), 2022-10-15

Supplementary Figure S1

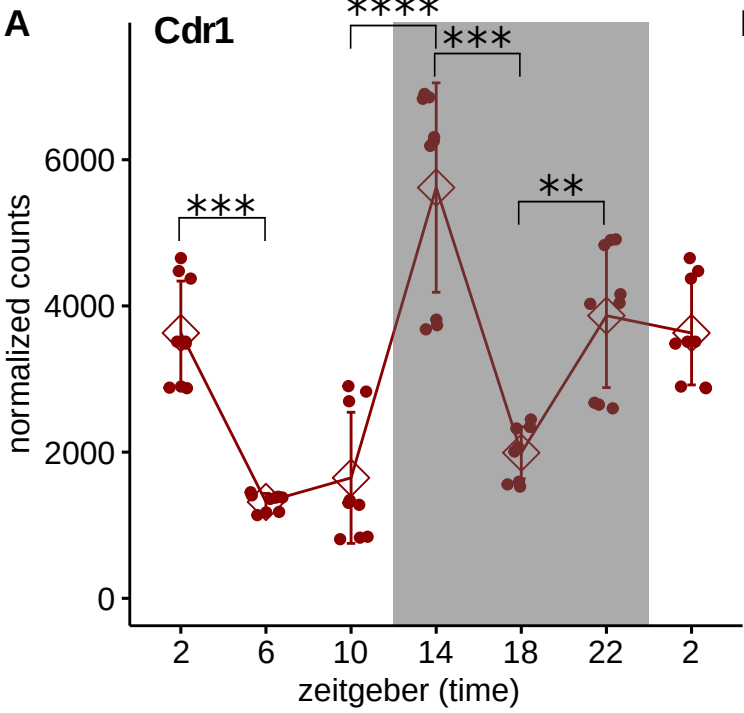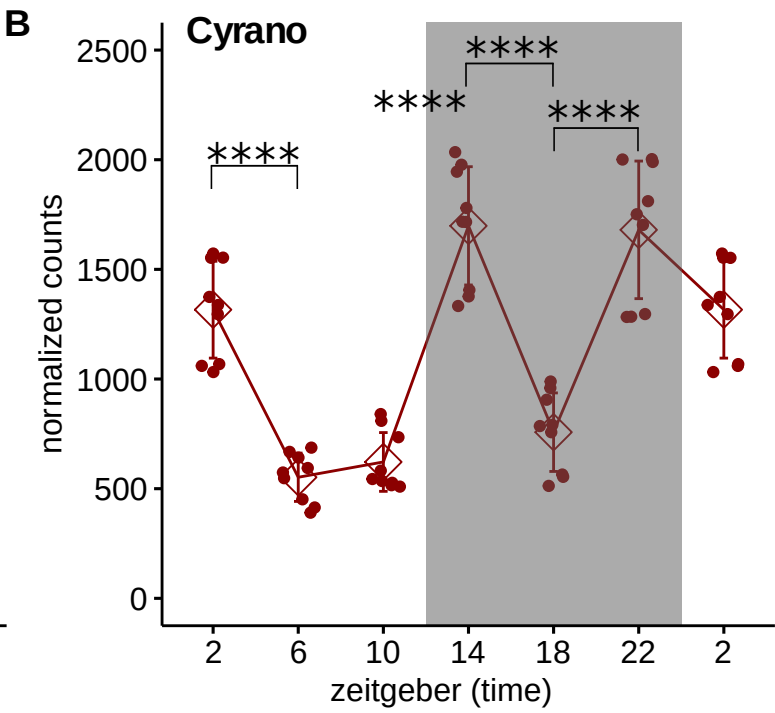

## Supplementary Figure S2

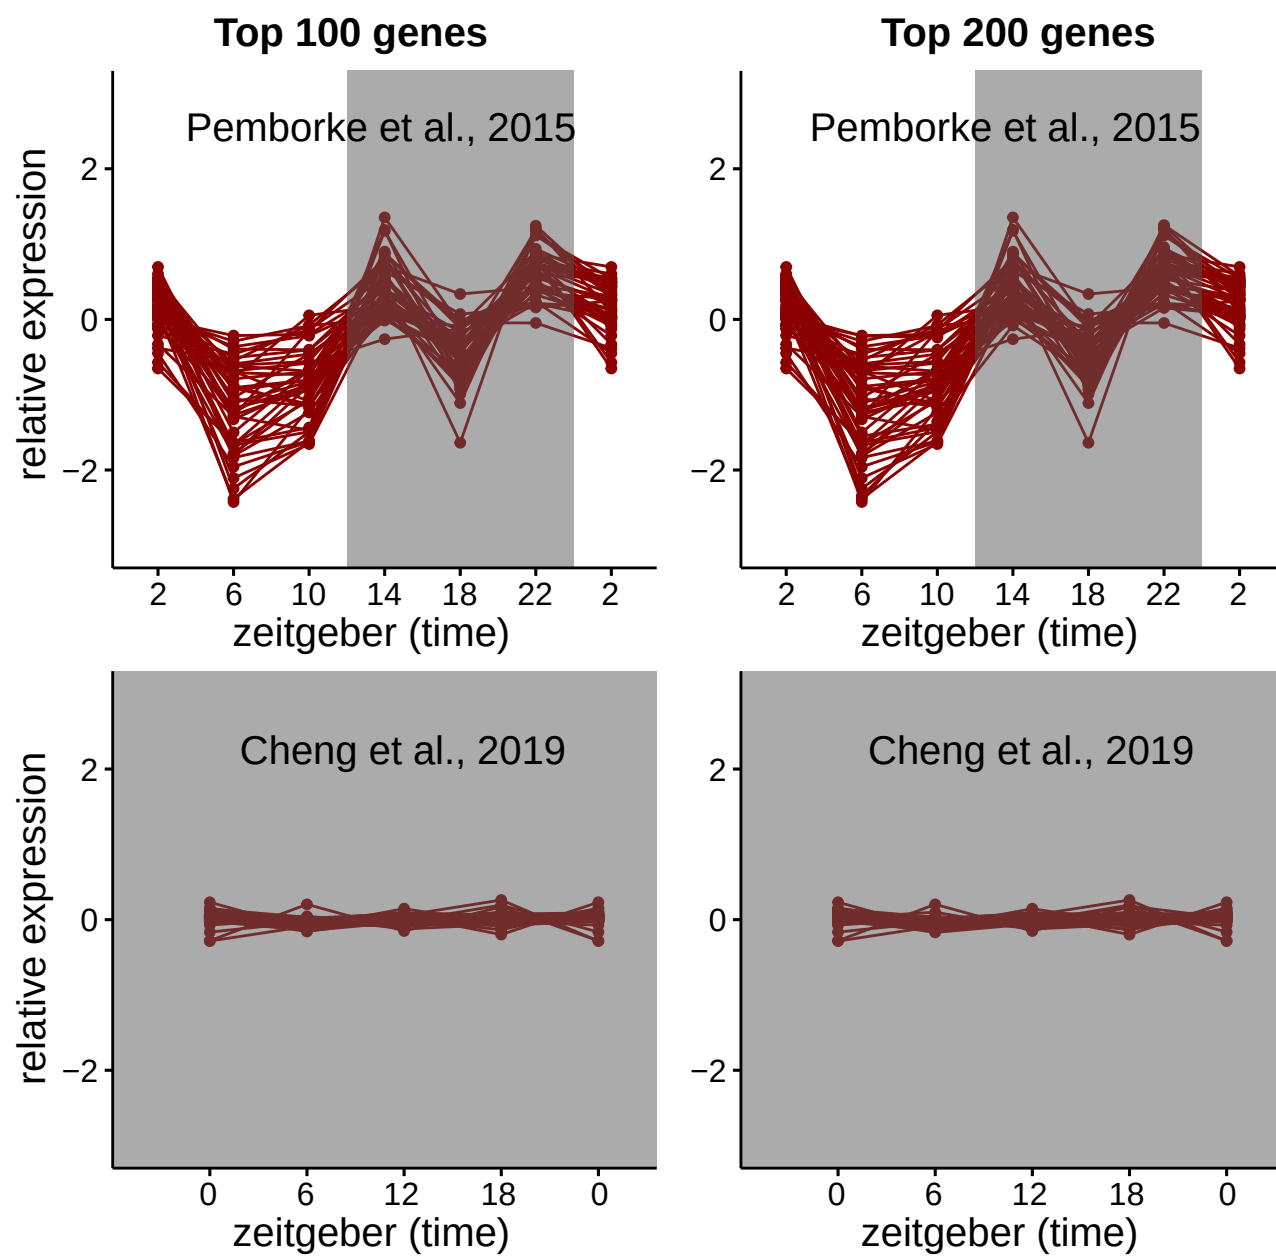

# Supplementary Figure S3

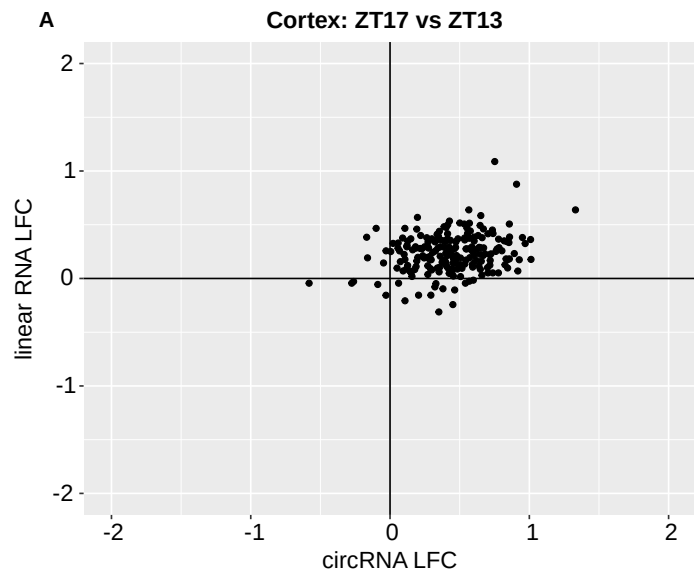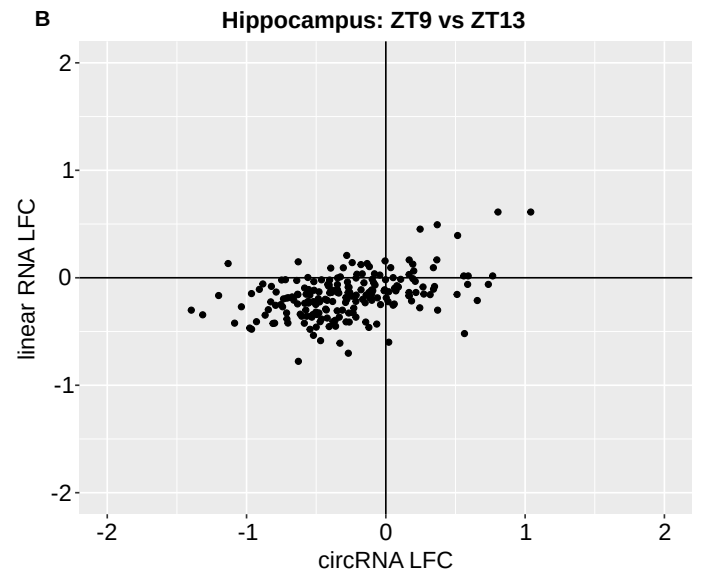

Supplement: s1 [file s1]
